## Correction: A Shot in the Arm for AIDS Vaccine Research

David D. Ho

DOI: 10.1371/journal.pmed.0020036

In *PLoS Medicine*, vol 2, issue 2.

David D. Ho states that he should have declared as a competing interest that two members of his research team and Ho himself are co-inventors on two candidate vaccines that are in clinical development. For this effort, they also receive funding from the International AIDS Vaccine Initiative.

This correction note may be found online at DOI: 10.1371/journal.pmed.0020299

Published August 30, 2005

Citation: (2005) Correction: A shot in the arm for AIDS vaccine research. *PLoS Med* 2(8): e299.

## Correction: Appropriate Models for the Management of Infectious Diseases

Helen J. Wearing, Pejman Rohani, Matt J. Keeling

DOI: 10.1371/journal.pmed.0020174

In *PLoS Medicine*, vol 2, issue 7.

Equation 4 was incorrectly printed. It should be as follows:

$$R_0 = \frac{\lambda \left( \frac{\lambda}{\sigma m} + 1 \right)^m}{\gamma \left( 1 - \left( \frac{\lambda}{\gamma n} + 1 \right)^{-n} \right)} \quad (4)$$

This correction note may be found online at DOI: 10.1371/journal.pmed.0020320.

Published August 30, 2005

Citation: (2005) Correction: Appropriate models for the management of infectious diseases. *PLoS Med* 2(8): e320.

## Correction: What Are the Roles and Responsibilities of the Media in Disseminating Health Information?

Gary Schwitzer, Ganapati Mudur, David Henry, Amanda Wilson, Merrill Goozner, Maria Simbra, Melissa Sweet, Katherine A. Baverstock

DOI: 10.1371/journal.pmed.0020215

In *PLoS Medicine*, vol 2, issue 7.

The following sentence contains an incorrect number: "Only by massaging the numbers could one figure out that physicians would need to put 700 women on statins to eliminate one cancer case (in medical parlance, this is called number needed to treat)."

The corrected sentence is as follows: "Only by massaging the numbers could one figure out that physicians would need to put 140 women on statins to eliminate one cancer case (in medical parlance, this is called number needed to treat)."

This correction note may be found online at DOI: 10.1371/journal.pmed.0020321.

Published August 30, 2005

Citation: (2005) Correction: What are the roles and responsibilities of the media in disseminating health information? *PLoS Med* 2(8): e321.
